# Supplementary material for: A novel biocompatible zwitterionic polyurethane with AIE effect for cell imaging in living cells
Source: Royal Society of Chemistry journal article supplement (doi:10.1039/c7ra13238g), 2018-01-01
Supplement: c7ra13238g1.pdf [file c7ra13238g1.pdf]

## Supporting Information(SI)

### A novel biocompatible zwitterionic polyurethane with AIE effect for cell imaging in living cells†

Junhuai Xu<sup>a</sup>, Rui Yan<sup>a</sup>, Haibo Wang<sup>a</sup>, Zongliang Du<sup>a</sup>, Jun Gu<sup>c</sup>, Xu Cheng<sup>a\*</sup>, Junjie Xiong<sup>b\*</sup>

<sup>a</sup> Textile Institute, College of Light Industry, Textile and Food Engineering, Sichuan University, Chengdu, 610065, China. E-mail: scuchx@163.com

<sup>b</sup> Department of Pancreatic Surgery, West China Hospital, Sichuan University, Chengdu 610041, China. E-mail: junjiex2011@126.com

<sup>c</sup> Department of Cardiovascular Surgery, West China Hospital, Sichuan University, Chengdu, Sichuan 610041, China

#### Synthesize of dihydroxy carboxybetaine (DHCB)

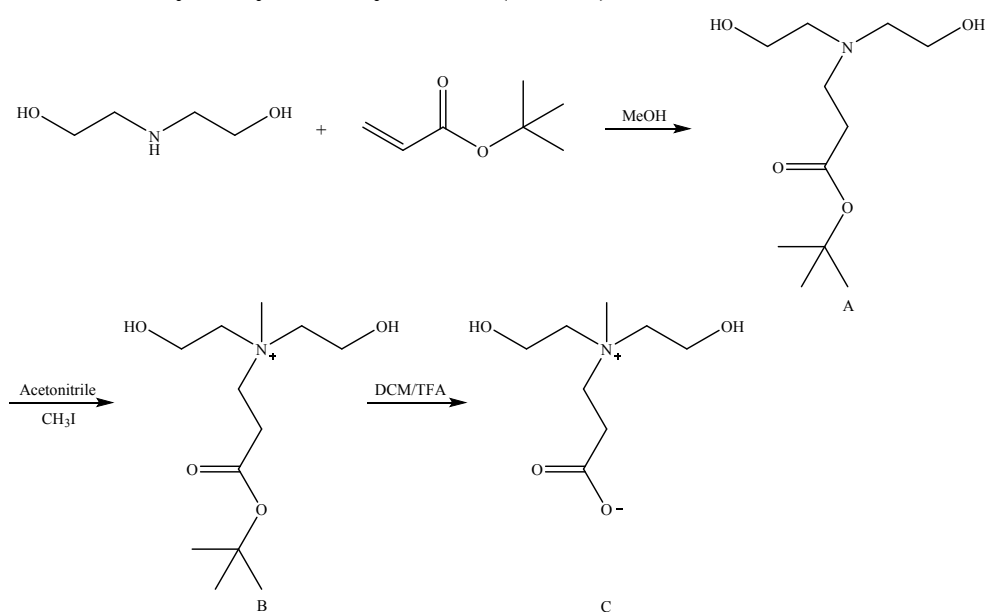

**Scheme S1** the detailed synthetic route of DHCB.

#### Synthesize of HO-TPE-OH

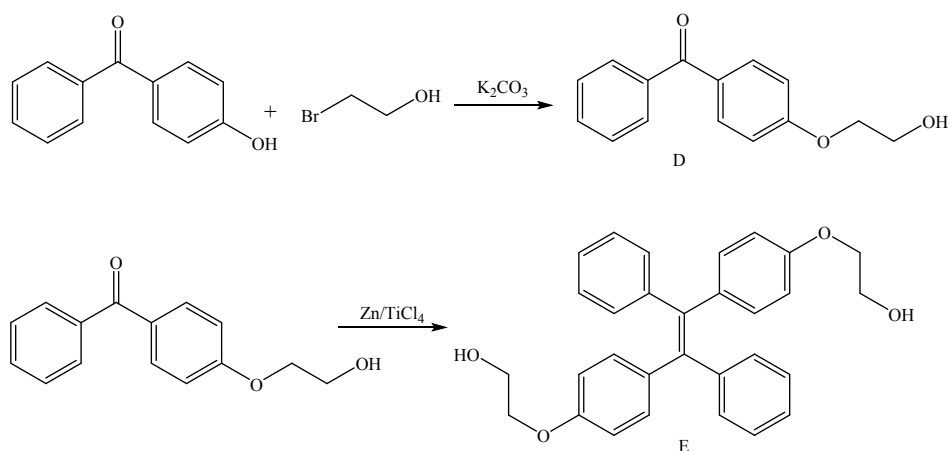

**Scheme S2** the detailed synthetic route of HO-TPE-OH.

## The $^1\text{H}$ NMR of tBu-DHCB

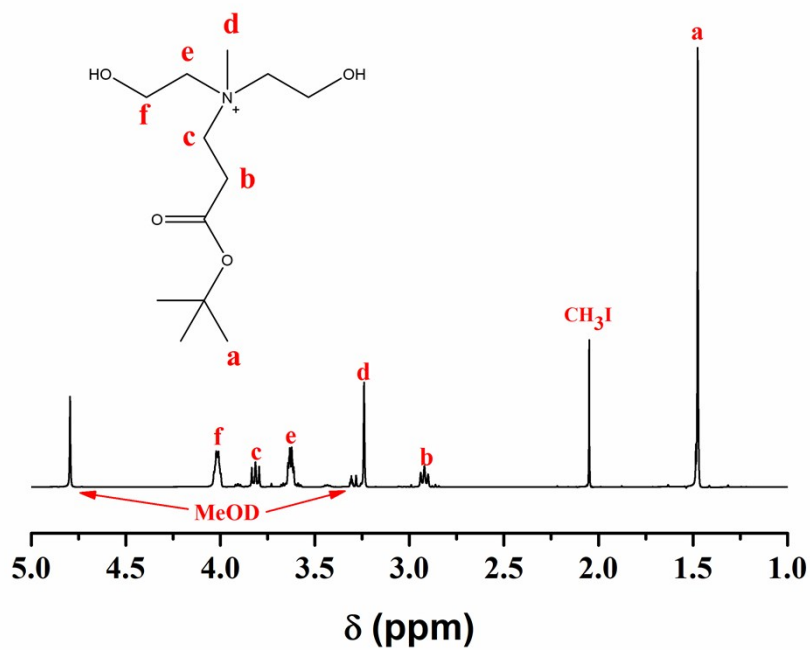

Figure S1  $^1\text{H}$  NMR of tBu-DHCB in methanol-D<sub>4</sub>

## The $^1\text{H}$ NMR of HO-TPE-OH

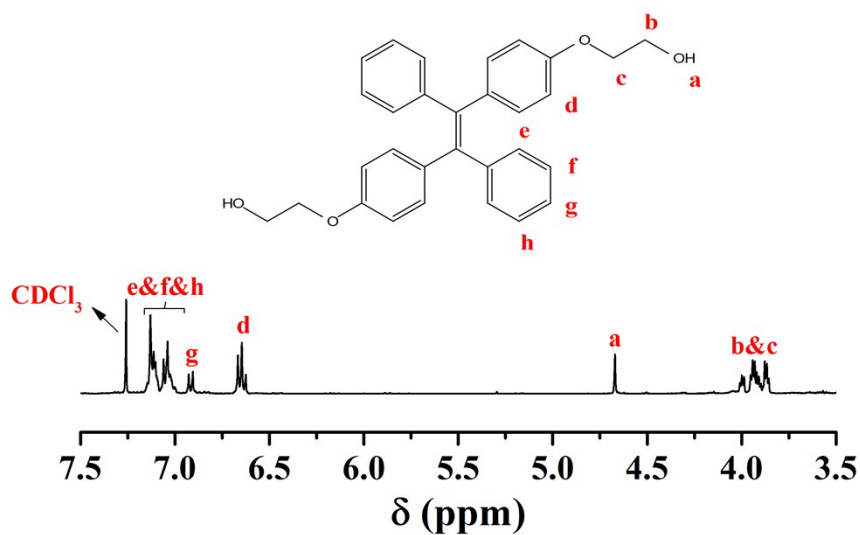

Figure S2  $^1\text{H}$  NMR of HO-TPE-OH in CDCl<sub>3</sub>.

## The mass spectrometry of HO-TPE-OH

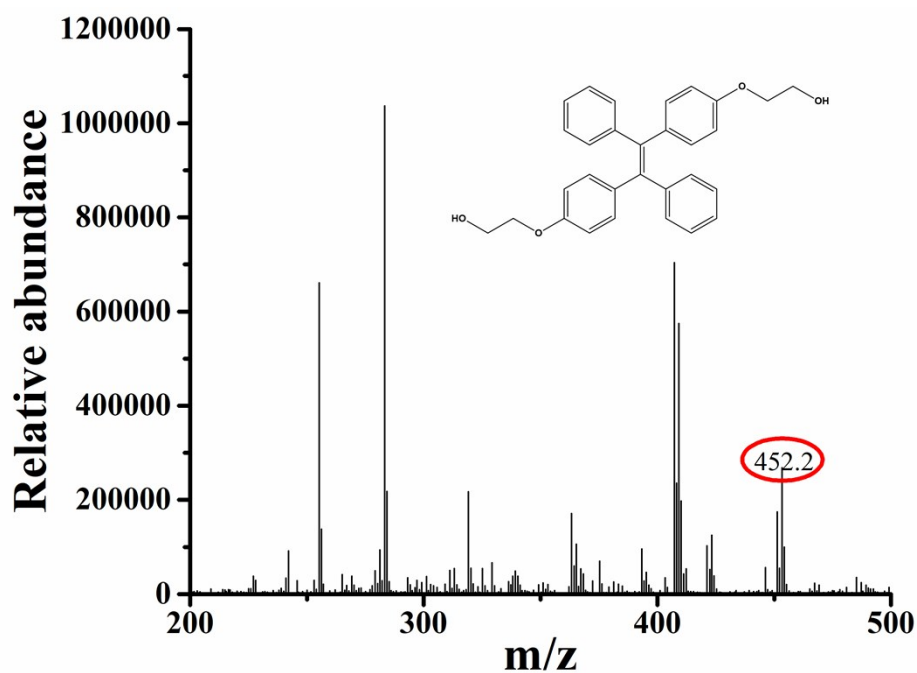

Figure S3 the mass spectrometry of HO-TPE-OH.

The FT-IR spectra of TPE, CBPUs and TPE-CB PUs

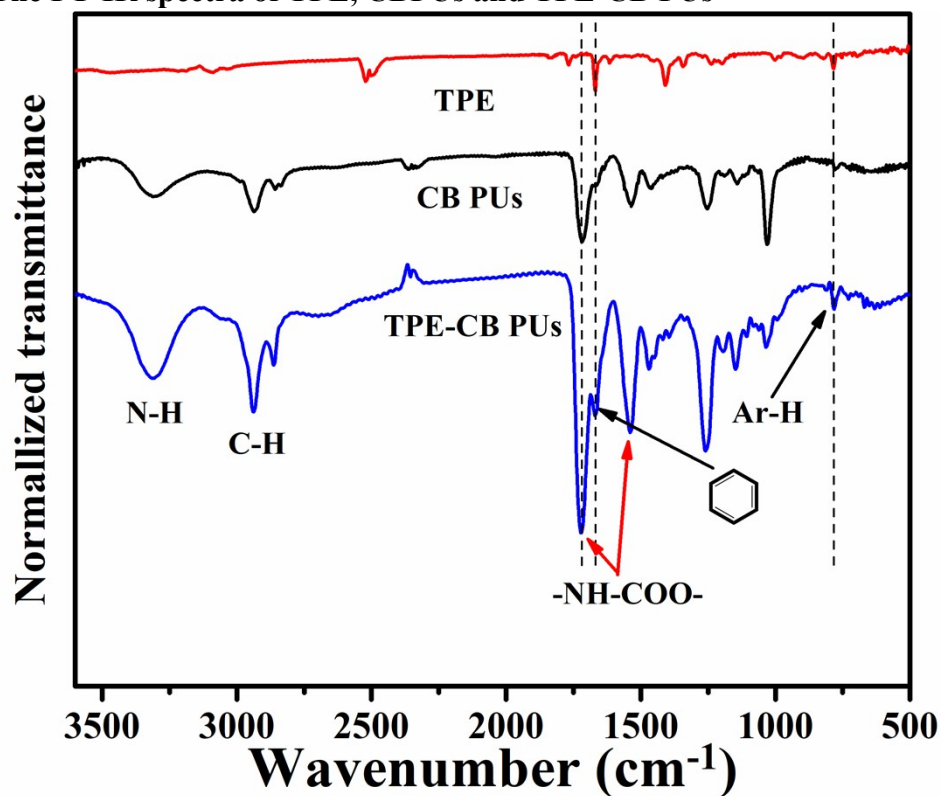

Figure S4 FT-IR spectra of TPE, CBPUs and TPE-CB PUs.

The AIE characteristic of TPE-CB PUs

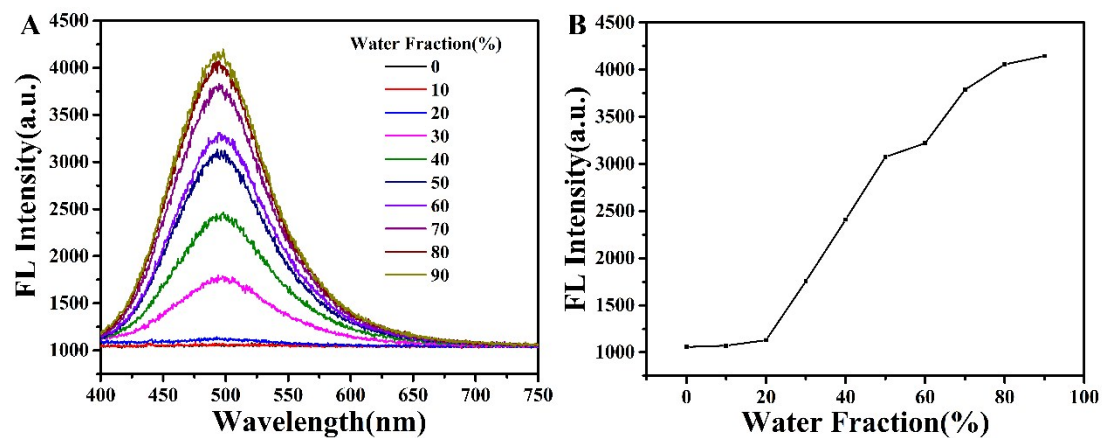

**Figure S5** (A) PL spectra of TPE-CB PUs in DMSO-water mixtures with different water fraction ( $\lambda_{\text{Ex}}=350$  nm); (B) the changes in PL peak of the compound in different water fraction mixtures.
